# Supplementary material
Source: PubMed Central journal article supplement (PMC3985525)

## Supplemental Material

Table S1: **Oligonucleotides used in cloning.** Restriction sites used are underlined. Stop codons are shown in bold. The oligonucleotides are written 5' to 3'.

| <i>Primer</i> | <i>Sequence</i>                                   | <i>Description</i>                    |
|---------------|---------------------------------------------------|---------------------------------------|
| pECG28F       | GCGCGCC <u>CATATGATCGTGGCGT</u> TTTTGTTTATAT      | Forward primer for pECG28; NdeI site  |
| pECG28R       | GCGCGCGGATCCTCAACCATCTAAACCACCTGT                 | Reverse primer for pECG28; BamHI site |
| pECB21F       | GGGACCTCC <u>CATATGGT</u> GAGTTTTACTC             | Forward primer for pECB21; NdeI site  |
| pECB21R       | CTATTTCCCGGAGGAA <u>ACTCGAGAA</u> CAAAG           | Reverse primer for pECB21; XhoI site  |
| pECI21F       | GGGACCTCGCTAGCCAGCAGGTGTTTTTCCAG                  | Forward primer for pECI21; NheI site  |
| pECI21R       | CTTTGTTTCTCGAGATGCTTTATCTTTTCAATAAA               | Reverse primer for pECI21; XhoI site  |
| pSTI28F       | GGGACCTCGCTAGCATGAGCAGAAAATATTTGA<br>AG           | Forward primer for pSTI28; NheI site  |
| pSTI28R       | CTTTGTTTCTCGAGTTATTCAAGAAGTTTACGTTTA<br>AAG       | Reverse primer for pSTI28; XhoI site  |
| pSTJ28F       | GGGACCTCCATATGGATTTCATTTCTGAGATAGAA<br>ATAG       | Forward primer for pSTJ28; NdeI site  |
| pSTJ28R       | CTTTGTTTCTCGAGTTATTTGTGGAAAAGTTTACG<br>ATAA AG    | Reverse primer for pSTJ28; XhoI site  |
| pSTK28F       | GGGACCTCCATATGATTAATAAAATCATATTTACT<br>GTTA CTC   | Forward primer for pSTK28; NdeI site  |
| pSTK28R       | CTTTGTTTCTCGAGTCACTTATCAAACCAGCTTTTC<br>ATT TGTTT | Reverse primer for pSTK28; XhoI site  |

Table S2: Abbreviations used for lipid A-oligosaccharides

|                         | Abbreviation                                            | Full Name                                                                                                                                                                                                                                                  | Label on Images  |
|-------------------------|---------------------------------------------------------|------------------------------------------------------------------------------------------------------------------------------------------------------------------------------------------------------------------------------------------------------------|------------------|
|                         | Hep <sub>2</sub> -1-deP-KLA                             | Heptose <sub>2</sub> -1-dephospho-Kdo <sub>2</sub> -Lipid A                                                                                                                                                                                                | A                |
| 1 core sugar added      | Glc-Hep <sub>2</sub> -1-deP-KLA                         | Glucose $\alpha(1\rightarrow3)$ -Heptose <sub>2</sub> -1-dephospho-Kdo <sub>2</sub> -Lipid A                                                                                                                                                               | B                |
| 2 cores sugars added    | Gal-Glc-Hep <sub>2</sub> -1-deP-KLA                     | Galactose $\alpha(1\rightarrow6)$ -Glucose $\alpha(1\rightarrow3)$ -Heptose <sub>2</sub> -1-dephospho-Kdo <sub>2</sub> -Lipid A                                                                                                                            | C                |
|                         | Glc <sub>2</sub> -Hep <sub>2</sub> -1-deP-KLA           | Glucose $\alpha(1\rightarrow3)$ -Glucose $\alpha(1\rightarrow3)$ -Heptose <sub>2</sub> -1-dephospho-Kdo <sub>2</sub> -Lipid A                                                                                                                              | C <sub>O</sub>   |
|                         | Gal*-Glc-Hep <sub>2</sub> -1-deP-KLA                    | Galactose $\alpha(1\rightarrow3)$ -Glucose $\alpha(1\rightarrow3)$ -Heptose <sub>2</sub> -1-dephospho-Kdo <sub>2</sub> -Lipid A                                                                                                                            | C <sub>I</sub>   |
| 3 core sugars added     | Glc-[Gal]-Glc-Hep <sub>2</sub> -1-deP-KLA               | Glucose $\alpha(1\rightarrow3)$ -[Galactose $\alpha(1\rightarrow6)$ ]-Glucose $\alpha(1\rightarrow3)$ -Heptose <sub>2</sub> -1-dephospho-Kdo <sub>2</sub> -Lipid A                                                                                         | D                |
|                         | Gal-[Gal]-Glc-Hep <sub>2</sub> -1-deP-KLA               | Galactose $\alpha(1\rightarrow3)$ -[Galactose $\alpha(1\rightarrow6)$ ]-Glucose $\alpha(1\rightarrow3)$ -Heptose <sub>2</sub> -1-dephospho-Kdo <sub>2</sub> -Lipid A                                                                                       | D <sub>s</sub>   |
| 4 core sugars added     | Glc-Gal-[Gal]-Glc-Hep <sub>2</sub> -1-deP-KLA           | Glucose $\alpha(1\rightarrow2)$ -Galactose $\alpha(1\rightarrow3)$ -[Galactose $\alpha(1\rightarrow6)$ ]-Glucose $\alpha(1\rightarrow3)$ -Heptose <sub>2</sub> -1-dephospho-Kdo <sub>2</sub> -Lipid A                                                      | E <sub>s</sub>   |
| 5 core sugars added     | GlcNAc-Glc-Gal-[Gal]-Glc-Hep <sub>2</sub> -1-deP-KLA    | <i>N</i> -Acetylglucosamine $\alpha(1\rightarrow2)$ -Glucose $\alpha(1\rightarrow2)$ -Galactose $\alpha(1\rightarrow3)$ -[Galactose $\alpha(1\rightarrow6)$ ]-Glucose $\alpha(1\rightarrow3)$ -Heptose <sub>2</sub> -1-dephospho-Kdo <sub>2</sub> -Lipid A | F <sub>s</sub>   |
| Multiple glucoses added | Glc <sub>n</sub> -Hep <sub>2</sub> -1-deP-KLA           | (Glucose $\alpha(1\rightarrow3)$ ) <sub>n</sub> -Glucose $\alpha(1\rightarrow3)$ -Heptose <sub>2</sub> -1-dephospho-Kdo <sub>2</sub> -Lipid A                                                                                                              | C <sub>O</sub> * |
|                         | Glc <sub>n</sub> -[Gal]-Glc-Hep <sub>2</sub> -1-deP-KLA | (Glucose $\alpha(1\rightarrow3)$ ) <sub>n</sub> -[Galactose $\alpha(1\rightarrow6)$ ]-Glucose $\alpha(1\rightarrow3)$ -Heptose <sub>2</sub> -1-dephospho-Kdo <sub>2</sub> -Lipid A                                                                         | D*               |

Figure S1: **UDP-Glucose was the only sugar that WaaG transferred to the Hep<sub>2</sub>-1-deP-KLA.** Panel A: WaaG (0.01 mg/ml) was reacted for 1 min with 0.01 mM Hep<sub>2</sub>-1-deP-KLA, 50 mM Hepes, pH 7.5, 0.1 % Triton X-100 and <1 μM <sup>14</sup>C-UDP-Glucose or <sup>14</sup>C-GDP-mannose and then displayed on a TLC plate as described in Materials and Methods. Panel B: WaaG (0.01 mg/ml) was reacted for 1 min with 10 μM [<sup>32</sup>P] Hep<sub>2</sub>-1-deP-KLA in the presence of various sugar nucleotides (1 mM), 50 mM Hepes, pH 7.5, 0.01 % Triton-X-100.

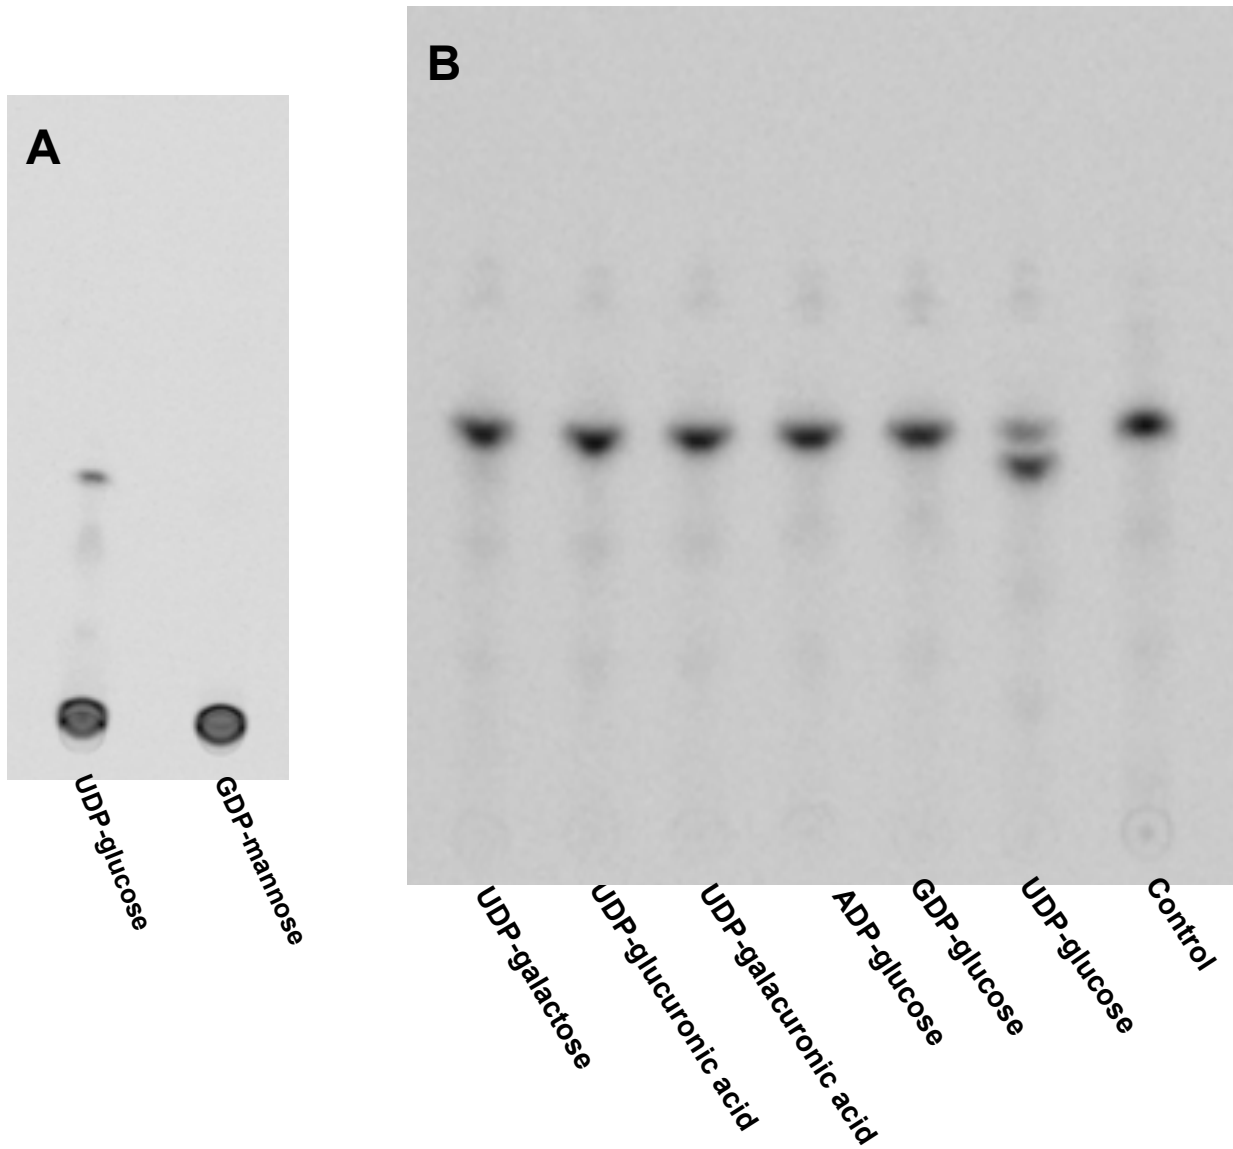

Figure S2: **Triton Dependence of WaaG reaction.** The Triton X-100 concentration was varied from 0 to 2 % in the in vitro assay described in the Materials and Methods.

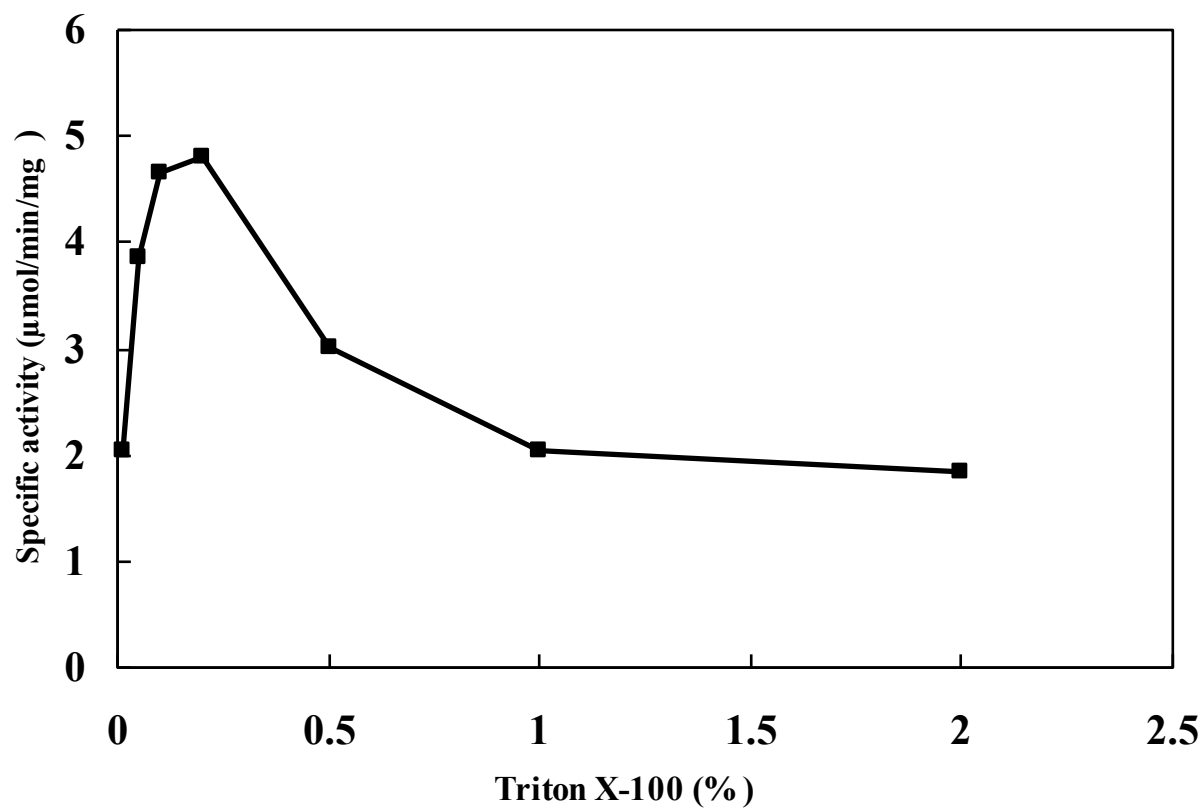

Figure S3: **MgCl<sub>2</sub> dependence of the WaaG reaction.** MgCl<sub>2</sub> concentration was varied from 0 to 5 mM in the WaaG *in vitro* reaction described in the Materials and Methods.

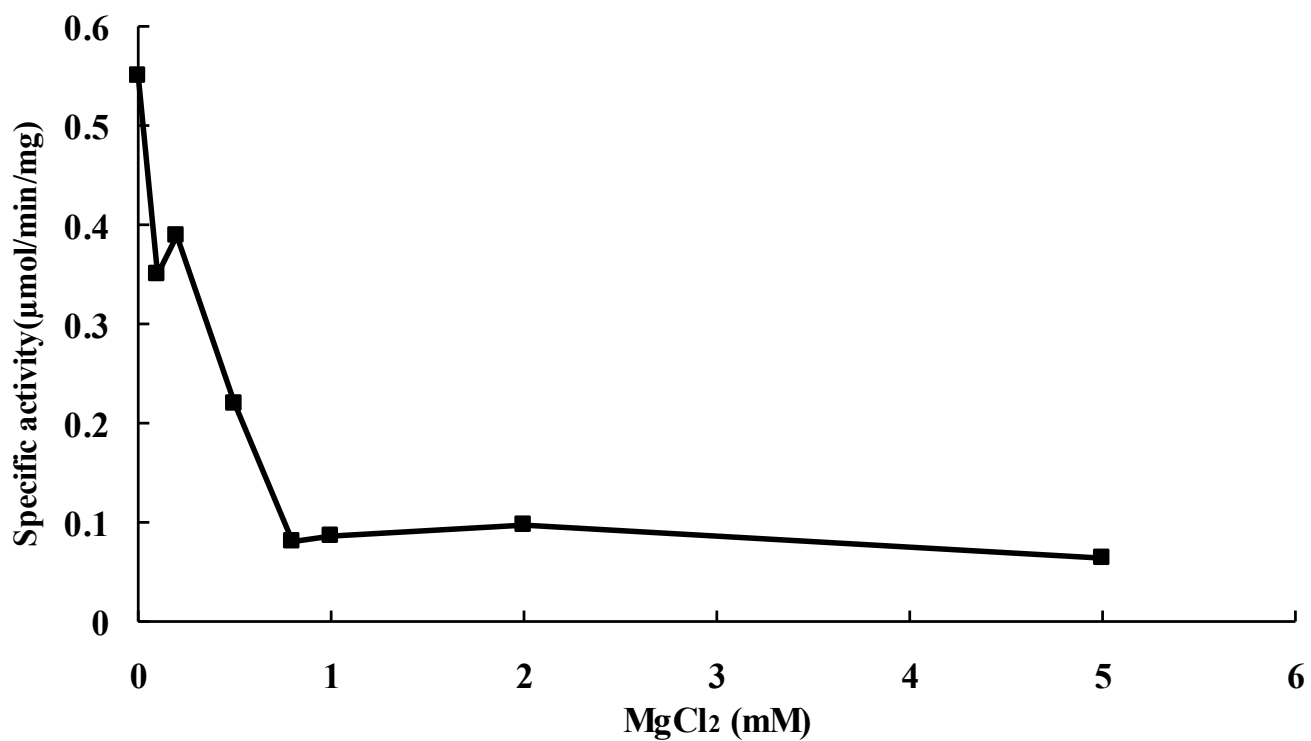

Figure S4: **WaaG is inhibited by MgCl<sub>2</sub> and other divalent cations.** WaaG (0.01 mg/ml) was reacted for 30 min with 0.5 mM UDP-Glc, 0.01 mM [<sup>32</sup>P]-Hep<sub>2</sub>-1-deP-KLA, 50 mM Hepes, pH 7.5, 0.1 % Triton X-100, and 1 mM of the indicated cation and then spotted to a TLC plate as described in Materials and Methods.

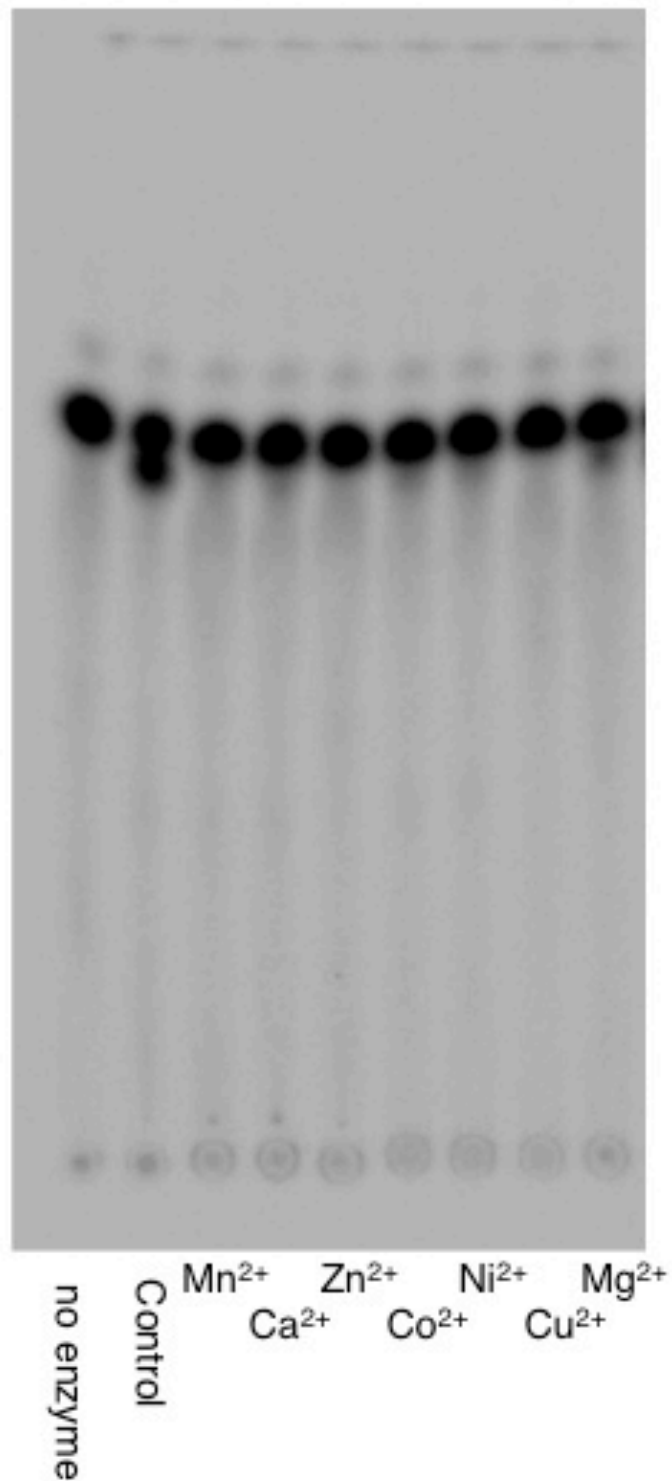

Figure S5: **WaaB hydrolyzes UDP-Gal but WaaG and WaaI hydrolyze UDP-Glc.** WaaG (0.25 mg/ml), WaaB (0.2 mg/ml), or WaaI (0.2 mg/ml) were reacted for 30 min with [<sup>14</sup>C]-UDP-galactose or [<sup>14</sup>C]-UDP-glucose, 0.1 % Triton X-100, 50 mM Hepes, pH 7.5 and displayed on TLC as described in Materials and Methods.

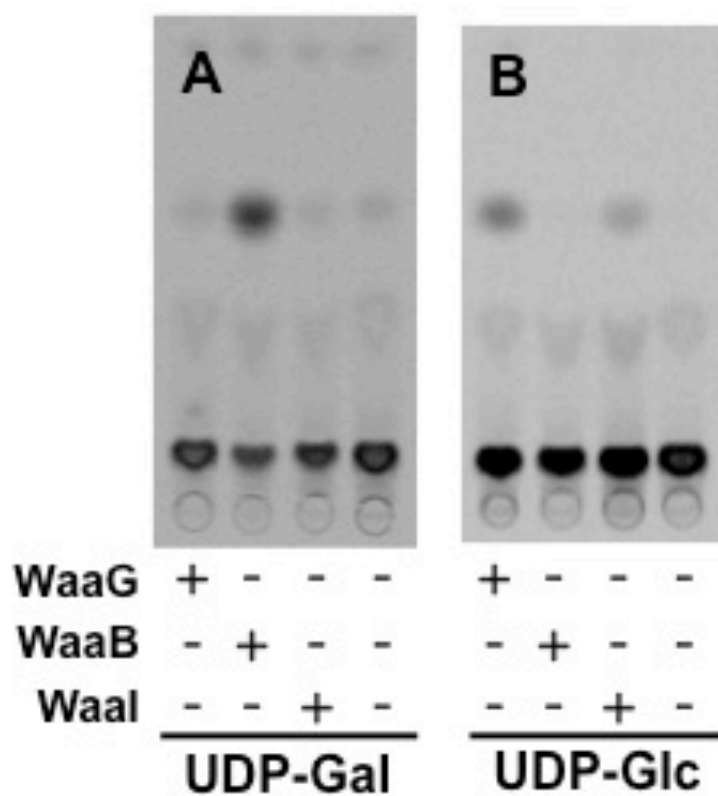

Figure S6: *S. typhimurium* WaaI uses UDP-galactose as its sugar donor. Panel A, left side: WaaG (0.01 mg/ml) was incubated with 10  $\mu$ M [ $^{32}$ P]-Hep<sub>2</sub>-1-deP-KLA (10  $\mu$ M), 0.1 % Triton X-100, 50 mM Hepes, pH 7.5, 1 mM UDP-Glc, and 1 mM UDP-Gal as indicated and resolved on TLC as described in Materials and Methods. Panel A, right side: WaaG (0.01 mg/ml) was incubated with 10  $\mu$ M [ $^{32}$ P]-Hep<sub>2</sub>-1-deP-KLA (10  $\mu$ M), 0.1 % Triton X-100, 50 mM Hepes, pH 7.5, and 1 mM UDP-Glc for 15 minutes and then 1 mM MgCl<sub>2</sub>, 1 mM UDP-Gal and WaaI (0.18 mg/ml) were added, incubated as indicated and resolved on TLC as described in Materials and Methods. Panel B: The exact same reactions as Panel A except no UDP-Gal was added. “A” indicates the location of Hep<sub>2</sub>-1-deP-KLA, “B” indicates the location of Glc-Hep<sub>2</sub>-1-deP-KLA, and “D<sub>s</sub>” indicates the location of Gal\*-Glc-Hep<sub>2</sub>-1-deP-KLA (\* indicates this Gal is added in a different linkage than the Gal added by WaaB).

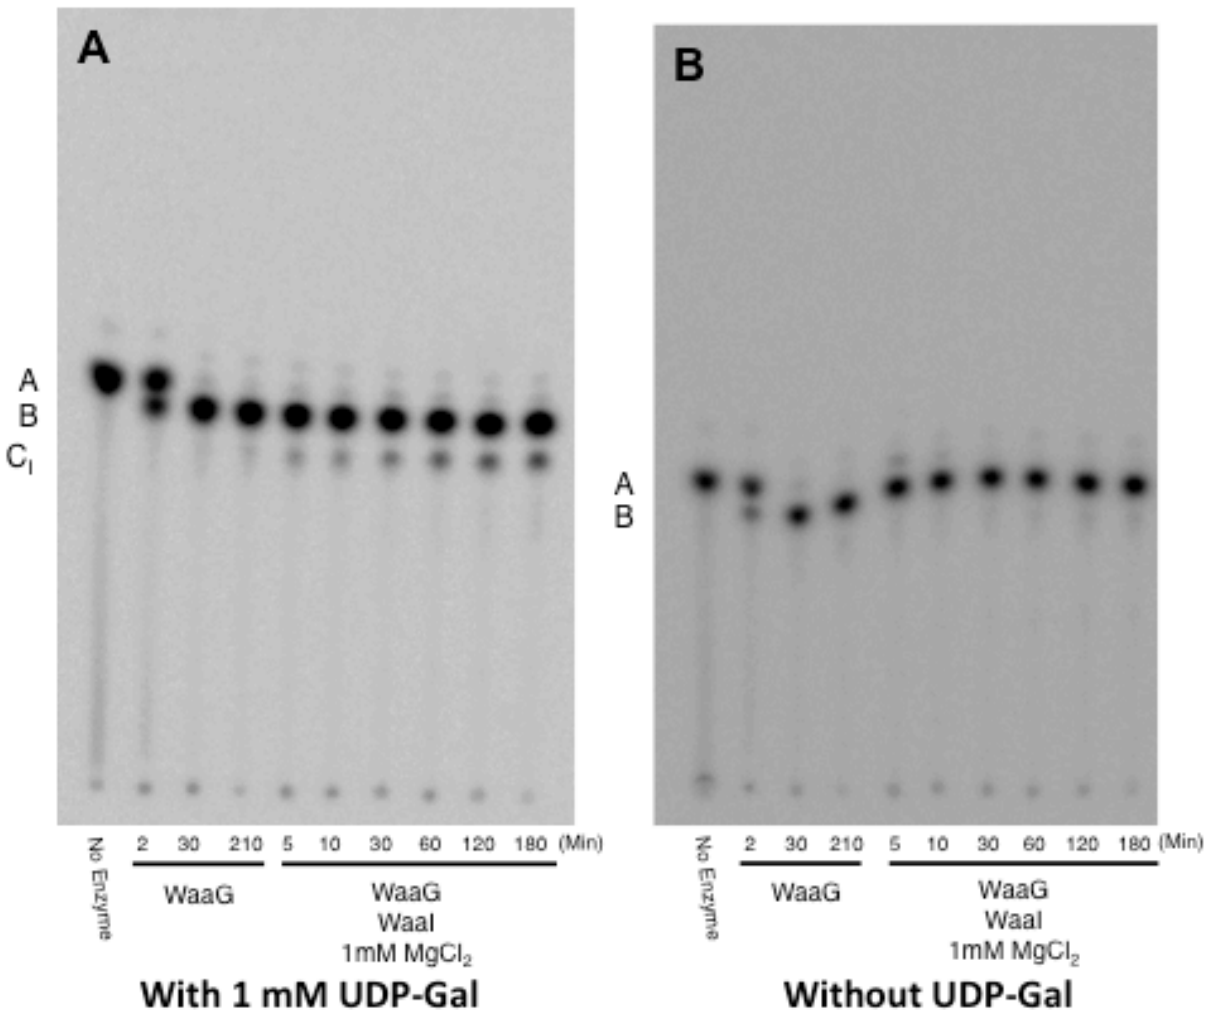

Supplement: bi4015665_si_001.pdf [file bi4015665_si_001.pdf]
